# Supplementary material
Source: PubMed Central journal article supplement (PMC3917556)
Supplement: NIHMS545668-supplement-Supplementary.pdf [file NIHMS545668-supplement-Supplementary.pdf]

## **Supplementary Information for**

“Protein Aggregation during Lyophilization: Protein Structural Descriptors as Predictors of Aggregation Propensity”, Lavanya K. Iyer, Brock C. Roughton, Esben Bertelsen, Kyle V. Camarda and Elizabeth M. Topp

### **Contents:**

**Table S1** – Protein structural descriptors and their definitions

**Table S2** – Summary of experimental measures of protein aggregation

**Table S3** – Summary of covariance analysis: Variable pairs with high degrees of covariance

**Table S1.** Protein structural descriptors and their definitions

| <b>AGGRESKAN Descriptor Name</b> | <b>Definition</b>                                                                                  |
|----------------------------------|----------------------------------------------------------------------------------------------------|
| a3vSA                            | Sequence average amino acid aggregation propensity                                                 |
| nHS                              | Number of aggregation hot spots                                                                    |
| NnHS                             | nHS normalized by number of residues in protein                                                    |
| AAT                              | Area of aggregation profile above hot spot threshold                                               |
| THSA                             | Total area of aggregation profile comprising hot spots                                             |
| TA                               | Total area of aggregation profile                                                                  |
| AATr                             | AAT normalized by number of residues in protein                                                    |
| THSAr                            | THSA normalized by number of residues in protein                                                   |
| Na4vSS                           | Sliding window average of amino acid propensity values divided by number of amino acids in protein |
| <b>PASTA Descriptor Name</b>     |                                                                                                    |
| Emin                             | Minimum energy of PASTA pairings                                                                   |
| Eavg                             | Average energy of PASTA pairings                                                                   |
| Lmax                             | Average amino acid pair length of PASTA pairings                                                   |
| Lavg                             | Maximum amino acid pair length of PASTA pairings                                                   |
| (E/L)min                         | Minimum ratio of energy to length of PASTA pairings                                                |
| (E/L)avg                         | Average ratio of energy to length of PASTA pairings                                                |
| # of Peaks                       | Number of peaks in PASTA aggregation profile                                                       |
| <b>Physical Descriptor Name*</b> |                                                                                                    |
| MW                               | Molecular weight (kDa)                                                                             |
| pI                               | Isoelectric point                                                                                  |
| % a-helix                        | Percent a-helical secondary structure (PDB)                                                        |
| % b-sheet                        | Percent b-sheet secondary structure (PDB)                                                          |
| # S-S                            | Number of disulfide bonds (PDB)                                                                    |
| # free thiols                    | Number of free thiol groups (PDB)                                                                  |
| T <sub>m</sub>                   | Melting temperature                                                                                |

\*See also Table 1

**Table S2.** Summary of experimental measures of protein aggregation using SEC (% monomeric protein values), UV-Visible Spectroscopy (A.I. values) and SDS-PAGE

| Protein                 | Formulation      |                   |                                  |                  |                   |                                  |                  |                   |                                  |                  |                   |                                  |                  |                   |                                             |                  |                   |                               |
|-------------------------|------------------|-------------------|----------------------------------|------------------|-------------------|----------------------------------|------------------|-------------------|----------------------------------|------------------|-------------------|----------------------------------|------------------|-------------------|---------------------------------------------|------------------|-------------------|-------------------------------|
|                         | Unlyophilized    |                   |                                  | Buffer           |                   |                                  | Sucrose          |                   |                                  | Glycine          |                   |                                  | Urea             |                   |                                             | Gdn HCl          |                   |                               |
|                         | SEC <sup>a</sup> | A.I. <sup>b</sup> | SDS-PAGE <sup>c</sup>            | SEC <sup>a</sup> | A.I. <sup>b</sup> | SDS-PAGE <sup>c</sup>            | SEC <sup>a</sup> | A.I. <sup>b</sup> | SDS-PAGE <sup>c</sup>            | SEC <sup>a</sup> | A.I. <sup>b</sup> | SDS-PAGE <sup>c</sup>            | SEC <sup>a</sup> | A.I. <sup>b</sup> | SDS-PAGE <sup>c</sup>                       | SEC <sup>a</sup> | A.I. <sup>b</sup> | SDS-PAGE <sup>c</sup>         |
| Myoglobin               | 100<br>(0)       | 71<br>(31)        | -                                | 96<br>(3)        | 123<br>(59)       | -,<br><i>dimer</i>               | 99<br>(3)        | 13<br>(1)         | -,<br><i>dimer</i>               | 99<br>(1)        | 15<br>(2)         | -,<br><i>dimer</i>               | 85<br>(6)        | 34<br>(15)        | Pellet,<br><i>dimer</i>                     | 0<br>(0)         | 24<br>(11)        | Pellet,<br><i>dimer</i>       |
| Lysozyme                | 100<br>(0)       | 5<br>(4)          | -,<br><i>dimer</i>               | 80<br>(12)       | 11<br>(10)        | -,<br><i>dimer</i>               | 77<br>(18)       | 7<br>(3)          | -,<br><i>dimer</i>               | 97<br>(2)        | 1.9<br>(0.3)      | -,<br><i>dimer</i>               | 65<br>(23)       | 18<br>(9)         | -,<br><i>dimer</i>                          | 0<br>(0)         | 2.1<br>(0.5)      | -,<br><i>dimer</i>            |
| Ovalbumin               | 100<br>(0)       | 43<br>(6)         | +,<br><i>dimer</i> ,<br><i>d</i> | 98<br>(2)        | 245<br>(8)        | +,<br><i>dimer</i> ,<br><i>d</i> | 97<br>(1)        | 5<br>(1)          | +,<br><i>dimer</i> ,<br><i>d</i> | 99.7<br>(1.7)    | 113<br>(14)       | +,<br><i>dimer</i> ,<br><i>d</i> | 16.5<br>(0.6)    | 413<br>(38)       | Pellet,<br>+,<br><i>dimer</i> ,<br><i>d</i> | 0<br>(0)         | 45<br>(14)        | Pellet,<br>+,<br><i>dimer</i> |
| RNase A                 | 100<br>(0)       | 0.8<br>(0.3)      | <i>dimer</i>                     | 113<br>(5)       | 2.2<br>(0.2)      | <i>dimer</i>                     | 89<br>(10)       | 6<br>(1)          | <i>dimer</i>                     | 97<br>(12)       | 6.2<br>(0.1)      | <i>dimer</i>                     | 97<br>(9)        | 5.1<br>(0.3)      | <i>dimer</i>                                | 0<br>(0)         | 28<br>(19)        | <i>dimer</i>                  |
| DNase I                 | 100<br>(0)       | 6.6<br>(0.1)      | -                                | 107<br>(15)      | 109<br>(5)        | -                                | 86<br>(12)       | 9.9<br>(0.8)      | -                                | 62<br>(35)       | 59<br>(1)         | -                                | 116<br>(12)      | 239<br>(14)       | -                                           | 0<br>(0)         | 44<br>(5)         | -                             |
| α -<br>chymotrypsinogen | 100<br>(0)       | 7<br>(7)          | -                                | 102<br>(6)       | 13<br>(12)        | -                                | 95.6<br>(0.5)    | 1.05<br>(0.01)    | -                                | 103<br>(2)       | 24<br>(11)        | -                                | 83<br>(4)        | 12<br>(8)         | -                                           | 0<br>(0)         | 9<br>(2)          | Pellet,<br>-                  |
| Cytochrome-C            | 100<br>(0)       | 159<br>(3)        | -,<br><i>dimer</i>               | 30<br>(23)       | 3388<br>(1817)    | -,<br><i>dimer</i>               | 33<br>(24)       | 120.4<br>(0.6)    | -,<br><i>dimer</i>               | 127<br>(90)      | 61.5<br>(0.9)     | -,<br><i>dimer</i>               | 0<br>(0)         | 193<br>(56)       | -,<br><i>dimer</i>                          | 0<br>(0)         | 65<br>(2)         | +,<br><i>dimer</i>            |
| Con A                   | 100<br>(0)       | 23<br>(6)         | -                                | 103<br>(20)      | 9<br>(1)          | -                                | 122<br>(19)      | 20<br>(7)         | -                                | 121<br>(15)      | 26<br>(2)         | -                                | 21<br>(9)        | 80<br>(19)        | -                                           | 45<br>(12)       | 388<br>(224)      | -                             |
| Catalase                | 100<br>(0)       | 21<br>(13)        | -                                | 90<br>(5)        | 18<br>(12)        | -                                | 98<br>(6)        | 2.6<br>(0.2)      | -                                | 100<br>(2)       | 160<br>(16)       | -                                | 19<br>(2)        | 48<br>(22)        | Pellet,<br>+, <i>d</i>                      | 0<br>(0)         | 10<br>(5)         | Pellet,<br>-                  |
| α-amylase               | 100<br>(0)       | 3.5<br>(0.5)      | +                                | 94<br>(3)        | 5<br>(1)          | +                                | 97<br>(4)        | 2.8<br>(0.2)      | +                                | 104<br>(2)       | 1.2<br>(0.4)      | +                                | 92<br>(4)        | 2.9<br>(0.6)      | +                                           | 2.77<br>(0.02)   | 76<br>(6)         | Pellet,<br>+                  |
| α-lactalbumin           | 100<br>(0)       | 14<br>(10)        | -,<br><i>dimer</i>               | 109<br>(11)      | 32.9<br>(0.5)     | -,<br><i>dimer</i>               | 99<br>(2)        | 1.6<br>(0.5)      | -,<br><i>dimer</i>               | 100<br>(4)       | 4.1<br>(0.8)      | -,<br><i>dimer</i>               | 97<br>(2)        | 2.2<br>(0.2)      | -,<br><i>dimer</i>                          | 0<br>(0)         | 19<br>(5)         | -                             |
| β-lactoglobulin         | 100<br>(0)       | 11<br>(9)         | -,<br><i>dimer</i>               | 92<br>(6)        | 1.7<br>(0.4)      | -,<br><i>Dimer</i>               | 95<br>(3)        | 2.5<br>(0.8)      | -,<br><i>dimer</i>               | 90<br>(6)        | 1.7<br>(0.2)      | -,<br><i>dimer</i>               | 83<br>(3)        | 4.8<br>(3.1)      | -,<br><i>dimer</i>                          | 0<br>(0)         | 924<br>(179)      | Pellet,<br>+                  |
| SOD                     | 100<br>(0)       | 3.5<br>(0.3)      | -                                | 89<br>(3)        | 3.65<br>(0.04)    | -                                | 99<br>(1)        | 0.7<br>(0.1)      | -                                | 100<br>(2)       | 15.9<br>(0.2)     | -                                | 113<br>(10)      | 155<br>(24)       | -                                           | 48<br>(20)       | 51<br>(10)        | +, <i>d</i>                   |
| BSA                     | 100<br>(0)       | 65.1<br>(0.5)     | +                                | 94<br>(2)        | 66.4<br>(0.5)     | +                                | 96.5<br>(0.6)    | 3.6<br>(0.5)      | +                                | 93.2<br>(1.3)    | 3.1<br>(0.8)      | +                                | 77.2<br>(0.4)    | 3.2<br>(0.6)      | +                                           | 117<br>(3)       | 18<br>(6)         | Pellet,<br>+                  |
| Trypsin Inhibitor       | 100<br>(0)       | 2.5<br>(0.3)      | -                                | 115<br>(16)      | 7<br>(1)          | -                                | 116<br>(15)      | 192<br>(5)        | -                                | 119<br>(13)      | 29<br>(1)         | -                                | 120<br>(15)      | 45<br>(4)         | -                                           | 0<br>(0)         | 304<br>(216)      | -                             |

<sup>a</sup>SEC values represented as average % monomer ± SEM (n=3)

<sup>b</sup>A.I. values represented as average A.I. ± SEM (n=3)

<sup>c</sup>'Pellet' indicates formation of insoluble aggregates upon centrifugation of the reconstituted lyophilized formulation; presence of high molecular weight aggregate bands (greater than twice the molecular weight of the native protein) indicated by +; absence of high molecular weight aggregate bands indicated by -; presence of dimer band indicated by *dimer*, presence of disulfide-linked aggregates indicated by *d*

**Table S3.** Summary of covariance analysis: Variable pairs with high degrees of covariance

| <b><math> \text{Covariance}(X,Y)  \geq 0.7</math></b>                                                                                                                                                                                                                                                                                                                                                                                                                                                                                                                                                                                                                                                                                                                       | <b><math> \text{Covariance}(X,Y)  \geq 0.8</math></b>                                                                                                                                | <b><math> \text{Covariance}(X,Y)  \geq 0.9</math></b>                                                                           |
|-----------------------------------------------------------------------------------------------------------------------------------------------------------------------------------------------------------------------------------------------------------------------------------------------------------------------------------------------------------------------------------------------------------------------------------------------------------------------------------------------------------------------------------------------------------------------------------------------------------------------------------------------------------------------------------------------------------------------------------------------------------------------------|--------------------------------------------------------------------------------------------------------------------------------------------------------------------------------------|---------------------------------------------------------------------------------------------------------------------------------|
| <p><i>(apolar, MW)</i></p> <p><i>(L<sub>max</sub>, (E/L)<sub>avg</sub>)</i></p> <p><i>((E/L)<sub>min</sub>, (E/L)<sub>avg</sub>)</i></p> <p><i>(a3vSA, E<sub>min</sub>)</i></p> <p><i>(a3vSA, E<sub>avg</sub>)</i></p> <p><i>(MW, AAT)</i></p> <p><i>(AAT, E<sub>min</sub>)</i></p> <p><i>(AAT, E<sub>avg</sub>)</i></p> <p><i>(THSA, E<sub>min</sub>)</i></p> <p><i>(THSA, E<sub>avg</sub>)</i></p> <p><i>(a3vSA, THSA)</i></p> <p><i>(a3vSA, TA)</i></p> <p><i>(a3vSA, AATr)</i></p> <p><i>(TA, AATr)</i></p> <p><i>(a3vSA, THSAr)</i></p> <p><i>(NnHS, THSAr)</i></p> <p><i>(Na4vSS, E<sub>min</sub>)</i></p> <p><i>(Na4vSS, E<sub>avg</sub>)</i></p> <p><i>(Na4vSS, THSA)</i></p> <p><i>(Na4vSS, TA)</i></p> <p><i>(Na4vSS, AATr)</i></p> <p><i>(Na4vSS, THSAr)</i></p> | <p><i>(% <math>\alpha</math>-helix, % <math>\beta</math>-sheet)</i></p> <p><i>(apolar, # free SH)</i></p> <p><i>(MW, nHS)</i></p> <p><i>(AAT, nHS)</i></p> <p><i>(THSA, nHS)</i></p> | <p><i>(E<sub>avg</sub>, E<sub>min</sub>)</i></p> <p><i>(L<sub>avg</sub>, L<sub>max</sub>)</i></p> <p><i>(Na4vSS, a3vSA)</i></p> |
